# Supplementary material for: Copper(ii) complexes of quinoline polyazamacrocyclic scorpiand-type ligands: X-ray, equilibrium and kinetic studies
Source: Royal Society of Chemistry journal article supplement (doi:10.1039/c2dt30223c), 2012-01-01
Supplement: c2dt30223c.pdf [file c2dt30223c.pdf]

# ELECTRONIC SUPPLEMENTARY INFORMATION

## Copper(II) Complexes of Quinoline Polyazamacrocyclic Scorpiand-Type Ligands: X-Ray, Equilibrium and Kinetic Studies

*Carmen E. Castillo,<sup>a</sup> M. Angeles Máñez,<sup>a</sup> Manuel G. Basallote,<sup>a\*</sup> M. Paz Clares,<sup>b</sup>  
Salvador Blasco,<sup>b</sup> and Enrique García-España<sup>b\*</sup>*

<sup>a</sup> Departamento de Ciencia de los Materiales e Ingeniería Metalúrgica y Química Inorgánica, Facultad de Ciencias, Universidad de Cádiz, Avenida República Saharaui s/n, Puerto Real, 11510 Cádiz, Spain. Email: manuel.basallote@uca.es

<sup>b</sup> Departamento de Química Inorgánica, Universidad de Valencia, Instituto de Ciencia Molecular, Edificio de Institutos de Paterna Apdo. 22085, 46071, Valencia, Spain. Email: enrique.garcia-es@uv.es

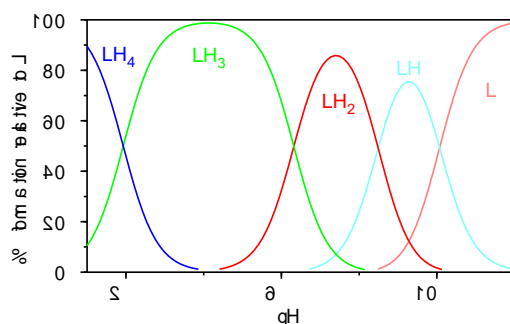

Figure S1. Distribution diagrams for the protonated species of L1.

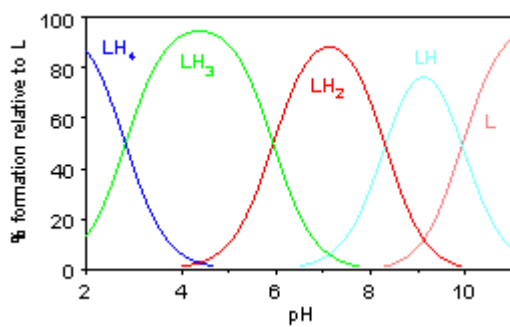

Figure S2. Distribution diagrams for the protonated species of **L2**.

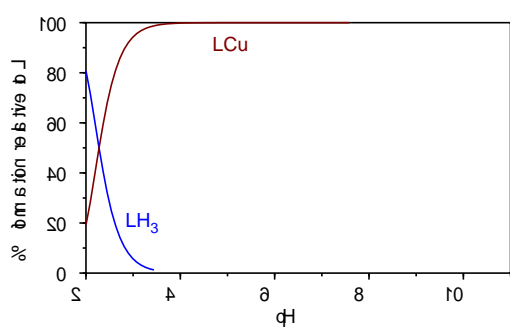

Figure S3. Distribution diagrams for the copper complexes of **L1**.

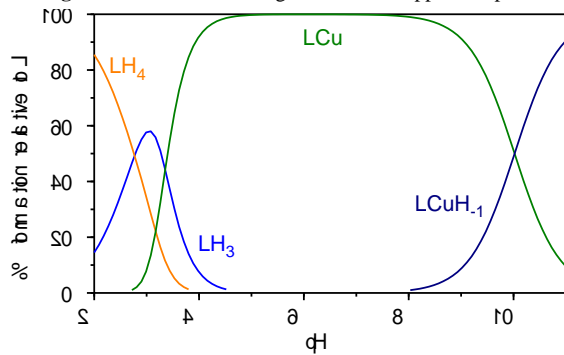

Figure S4. Distribution diagrams for the copper complexes of **L2**.

**Table S1.** Shift of the NMR  $\Delta(\Delta\delta)$  signals in ppm observed upon formation of the different protonated forms of the **L1** ligand.<sup>a</sup>

| NMR signal <sup>c</sup> | Protonation process <sup>b</sup> |                                                  |                                                                 |                                                                 |
|-------------------------|----------------------------------|--------------------------------------------------|-----------------------------------------------------------------|-----------------------------------------------------------------|
|                         | L → HL <sup>+</sup>              | HL <sup>+</sup> → H <sub>2</sub> L <sup>2+</sup> | H <sub>2</sub> L <sup>2+</sup> → H <sub>3</sub> L <sup>3+</sup> | H <sub>3</sub> L <sup>3+</sup> → H <sub>4</sub> L <sup>4+</sup> |
| H1                      | 0.32                             | 0.26                                             | 0.51                                                            | -0.02                                                           |
| H2                      | 0.46                             | 0.31                                             | 0.21                                                            | -0.02                                                           |
| H3                      | 0.61                             | 0.19                                             | 0.02                                                            | -0.04                                                           |
| H4                      | 0.36                             | 0.17                                             | 0.16                                                            | -0.06                                                           |
| H5                      | 0.21                             | 0.13                                             | 0.52                                                            | 0.07                                                            |
| H6                      | 0.03                             | 0.39                                             | 0.28                                                            | 0.21                                                            |
| C1                      | -2.0                             | -0.9                                             | 0.6                                                             | 0.0                                                             |
| C2                      | 1.3                              | 0.4                                              | -1.0                                                            | -0.1                                                            |
| C3                      | -0.2                             | -1.5                                             | -2.0                                                            | -0.1                                                            |
| C4                      | -0.3                             | -0.6                                             | -1.8                                                            | -0.1                                                            |
| C5                      | -0.4                             | -0.6                                             | -1.7                                                            | 1.0                                                             |
| C6                      | 0.8                              | -0.7                                             | -2.8                                                            | -2.9                                                            |

<sup>a</sup> The values are only approximate because the different protonated forms of the ligand usually do not reach 100% formation at any pH value. <sup>b</sup> The shifts in the signals were obtained from the spectra recorded at pD values where the different species reach its maximum concentration: 12.11 for L, 9.22 for HL<sup>+</sup>, 7.53 for H<sub>2</sub>L<sup>2+</sup>, 4.10 for H<sub>3</sub>L<sup>3+</sup> and 0.93 for H<sub>4</sub>L<sup>4+</sup>. <sup>c</sup> For simplicity, only the most relevant proton and carbon signals are included.

**Table S2.** Shift of the NMR signals observed upon formation of the different protonated forms of the **L2** ligand.<sup>a</sup>

| NMR signal <sup>c</sup> | Protonation process <sup>b</sup> |                                                  |                                                                 |                                                                 |
|-------------------------|----------------------------------|--------------------------------------------------|-----------------------------------------------------------------|-----------------------------------------------------------------|
|                         | L → HL <sup>+</sup>              | HL <sup>+</sup> → H <sub>2</sub> L <sup>2+</sup> | H <sub>2</sub> L <sup>2+</sup> → H <sub>3</sub> L <sup>3+</sup> | H <sub>3</sub> L <sup>3+</sup> → H <sub>4</sub> L <sup>4+</sup> |
| H1                      | 0.43                             | 0.42                                             | 0.33                                                            | -0.17                                                           |
| H2                      | 0.55                             | 0.33                                             | 0.24                                                            | -0.17                                                           |
| H3                      | 0.59                             | 0.14                                             | 0.08                                                            | -0.18                                                           |
| H4                      | 0.41                             | 0.11                                             | 0.17                                                            | -0.16                                                           |
| H5                      | 0.25                             | 0.03                                             | 0.60                                                            | -0.07                                                           |
| H6                      | 0.00                             | 0.08                                             | 0.71                                                            | 0.11                                                            |
| C1                      | -1.4                             | -0.9                                             | 0.6                                                             | -0.3                                                            |
| C2                      | 0.6                              | 0.6                                              | -0.8                                                            | -0.5                                                            |
| C3                      | -0.9                             | -2.1                                             | -1.8                                                            | -0.3                                                            |
| C4                      | -0.1                             | -0.3                                             | -3.8                                                            | -0.6                                                            |
| C5                      | -0.2                             | -0.5                                             | -1.9                                                            | 0.3                                                             |
| C6                      | 0.1                              | -0.4                                             | -0.8                                                            | -0.4                                                            |

<sup>a</sup> The values are only approximate because the different protonated forms of the ligand usually do not reach 100% formation at any pH value. <sup>b</sup> The shifts in the signals were obtained from the spectra recorded at pD values where the different species reach its maximum concentration: 12.38 for L, 9.17 for HL<sup>+</sup>, 7.36 for H<sub>2</sub>L<sup>2+</sup>, 4.34 for H<sub>3</sub>L<sup>3+</sup>, and 0.00 for H<sub>4</sub>L<sup>4+</sup>. <sup>c</sup> For simplicity, only the most relevant proton and carbon signals are included in the Table. Nevertheless, complete spectra can be found in ref 9.

**Table S3.** Selected bond lengths (Å) and angles (deg) for complex [Cu(L1)](ClO<sub>4</sub>)<sub>2</sub>·H<sub>2</sub>O.

| Bond Distances (Å) |          | Bond Angles |          |
|--------------------|----------|-------------|----------|
| Cu1-N1             | 1.979(5) | N1-Cu1-N2   | 78.8(2)  |
| Cu1-N2             | 2.309(6) | N1-Cu1-N3   | 91.8(2)  |
| Cu1-N3             | 2.183(6) | N1-Cu1-N4   | 78.9(2)  |
| Cu1-N4             | 2.276(6) | N1-Cu1-N5   | 175.0(3) |
| Cu1-N5             | 1.976(7) | N1-Cu1-N6   | 104.4(2) |
| Cu1-N6             | 2.173(5) | N2-Cu1-N3   | 81.1(2)  |
|                    |          | N2-Cu1-N4   | 150.2(2) |
|                    |          | N2-Cu1-N5   | 98.9(3)  |
|                    |          | N2-Cu1-N6   | 104.0(2) |
|                    |          | N3-Cu1-N4   | 80.0(2)  |
|                    |          | N3-Cu1-N5   | 83.5(3)  |
|                    |          | N3-Cu1-N6   | 163.7(2) |
|                    |          | N4-Cu1-N5   | 101.6(3) |
|                    |          | N4-Cu1-N6   | 100.5(2) |
|                    |          | N5-Cu1-N6   | 80.4(2)  |

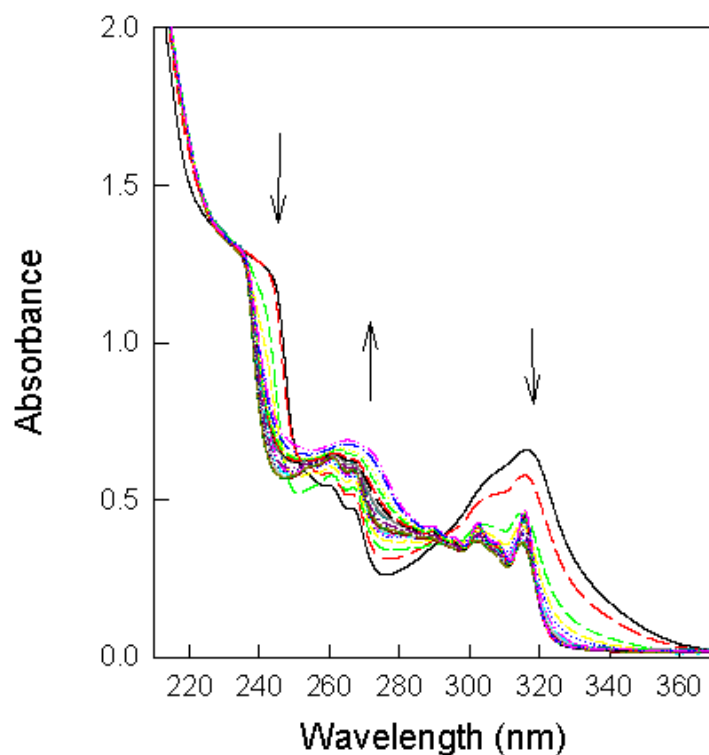

**Figure S5.** Spectral changes recorded during the titration of **L1**. The spectra were recorded at the following pH values: 1.09, 1.56, 2.10, 2.47, 2.90, 3.61, 4.00, 4.53, 5.11, 5.55, 6.06, 6.56, 6.99, 7.51, 8.08, 8.67, 8.98, 9.46, 9.95, 10.50, and 11.03, and the arrows indicate the direction of changes when the pH is increased.

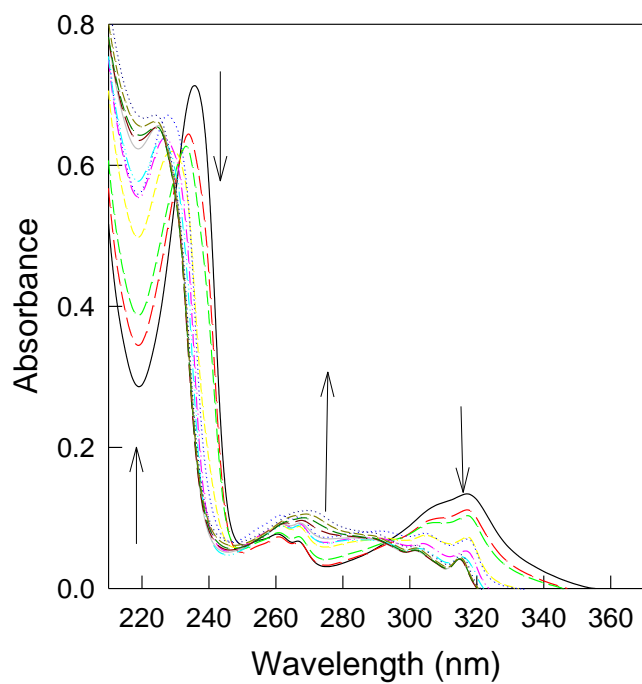

**Figure S6.** Spectral changes recorded during the titration of **L2**. The spectra were recorded at the following pH values: 2.05, 2.74, 3.01, 3.85, 4.46, 5.15, 5.81, 6.87, 8.18, 8.94, 9.62 and 10.12, and the arrows indicate the direction of changes when the pH is increased.
